# Supplementary material for: A thermophilic cell-free cascade enzymatic reaction for acetoin synthesis from pyruvate
Source: PubMed Central journal article supplement (PMC5489476; doi:10.1038/s41598-017-04684-8), 2017-06-28
Supplement: 41598_2017_4684_MOESM1_ESM.pdf [file 41598_2017_4684_MOESM1_ESM.pdf]

# A thermophilic cell-free cascade enzymatic reaction for acetoin synthesis from pyruvate

Xiaojing Jia<sup>1,2</sup>, Ying Liu<sup>1</sup> & Yejun Han<sup>1</sup>

<sup>1</sup>National Key Laboratory of Biochemical Engineering, Institute of Process Engineering, Chinese Academy of Sciences, Beijing 100190, PR China. <sup>2</sup>University of Chinese Academy of Sciences, Beijing 100049, PR China. Correspondence and requests for materials should be addressed to Y. H. (email: yjhan@ipe.ac.cn)

**Table**

| Strains, plasmids and primers             | Properties and sequences                                    | Sources    |
|-------------------------------------------|-------------------------------------------------------------|------------|
| Strains                                   |                                                             |            |
| <i>Caldicellulosiruptor owensensis</i> OL | DSM 13100, wild type                                        | DSMZ       |
| <i>Bacillus subtilis</i> IPE5-4           | Wild type                                                   | Lab stock  |
| <i>Escherichia coli</i> Top10             | Cloning host                                                | TianGen    |
| <i>E. coli</i> BL21(DE3)                  | Expression host                                             | Novagen    |
| Plasmids                                  |                                                             |            |
| pET28b                                    | Overexpression vector; Kan <sup>r</sup>                     | Novagen    |
| pET28b-coAHASL1                           | pET28b with <i>coilyB</i> gene of <i>C. owensensis</i>      | This study |
| pET28b-coAHASS                            | pET28b with <i>coilyN</i> gene of <i>C. owensensis</i>      | This study |
| pET28b-coAHASL2                           | pET28b with <i>coilyI</i> gene of <i>C. owensensis</i>      | This study |
| pET28b-bsALDC                             | pET28b with <i>bsalsD</i> gene of <i>B. subtilis</i> IPE5-4 | This study |
| Primers (5'-3')                           |                                                             |            |
| <i>coilyB</i> -F                          | GACGACGACAAGatgaaggtgaagatgacggtagcac                       | This study |
| <i>coilyB</i> -R                          | GAGGAGAAGCCCGGttaaggtatagttggctcatcag                       | This study |
| <i>coilyN</i> -F                          | GACGACGACAAGatgaaatatacactttcagtttgggtg                     | This study |
| <i>coilyN</i> -R                          | GAGGAGAAGCCCGGttactcatcctcctcagacttag                       | This study |
| <i>coilyI</i> -F                          | GACGACGACAAGatgaaattaacaggagctgaaattataatc                  | This study |
| <i>coilyI</i> -R                          | GAGGAGAAGCCCGGttaatcaataatctcatcaattggcg                    | This study |
| <i>bsalsD</i> -F                          | GACGACGACAAGatgaaacgmgaagcaayattcaagtgct                    | This study |
| <i>bsalsD</i> -R                          | GAGGAGAAGCCCGGttatcmgggcttccttcrgttgttc                     | This study |

**Table S1. Strains, plasmids, and primers used in this study.**

## Figure Legends

### Figure S1. Genomic organization and phylogenetic tree analysis of ALS and

**ALDC.** (A) Genomic organization of the various *ilv* genes encoding ALS in *C. owensensis*. (B) Phylogenetic tree of *C. owensensis* ALS. (C) Phylogenetic tree of *B. subtilis* IPE5-4 ALDC. Abbreviations: AHASL, catalytic subunit of acetohydroxyacid synthase; AHASS, regulatory subunit of acetohydroxyacid synthase; KARI, ketol-acid reductoisomerase (EC 1.1.1.86); IPMS, 2-isopropylmalate synthase (EC 2.3.3.13); DHAD, dihydroxyaciddehydratase (EC 4.2.1.9). The trees were constructed using MEGA 5.05 with 1000 bootstrap values, and GenBank accession numbers of each protein were listed after scientific names.

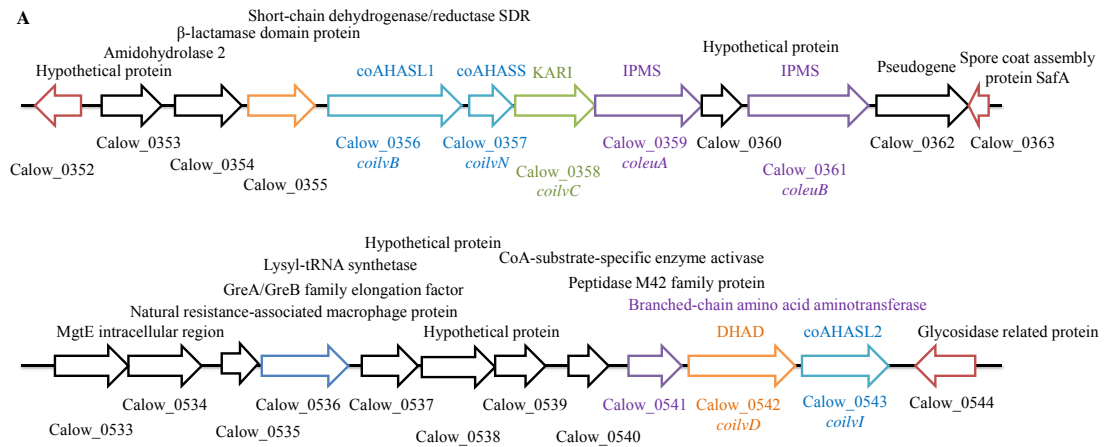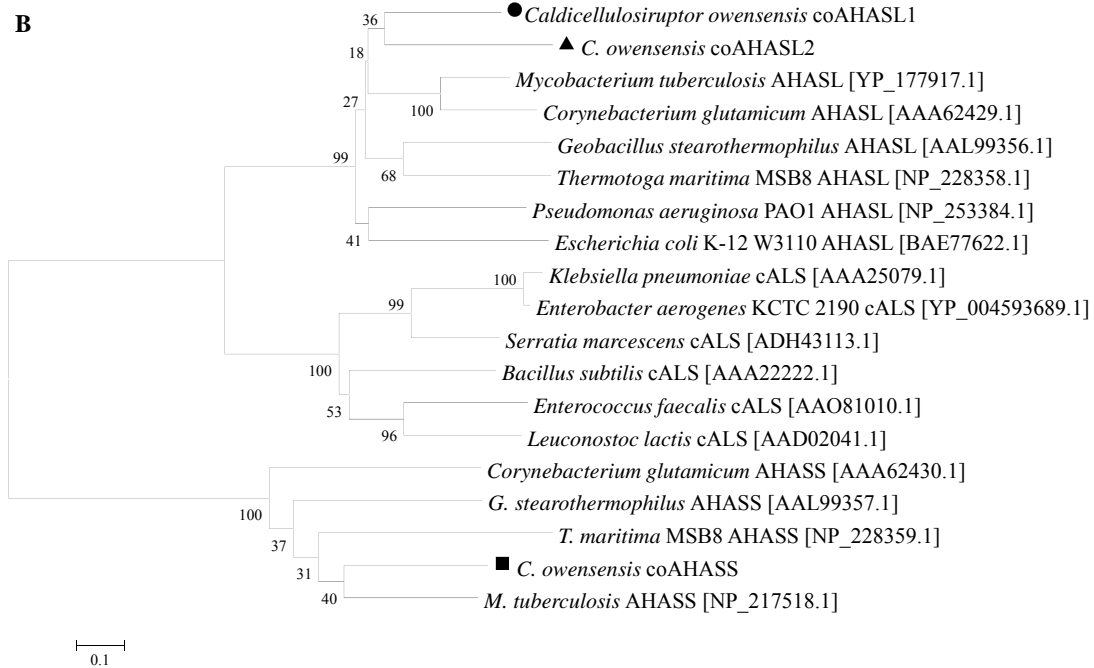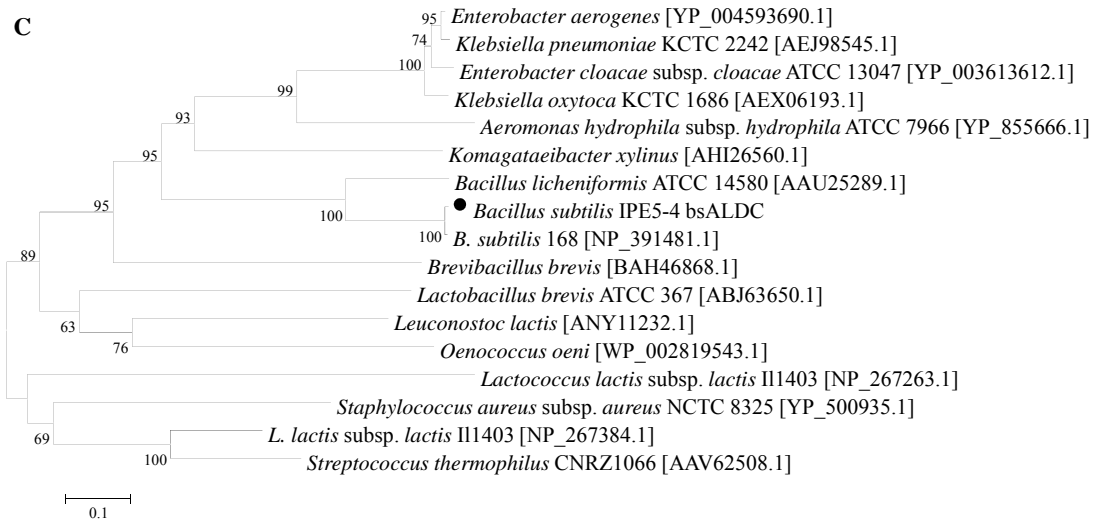

**Figure S1**
